# Supplementary material
Source: PubMed Central journal article supplement (PMC5650058)
Supplement: NIHMS908239-supplement-supplement_1.pdf [file NIHMS908239-supplement-supplement_1.pdf]

## Supplemental Figure S1

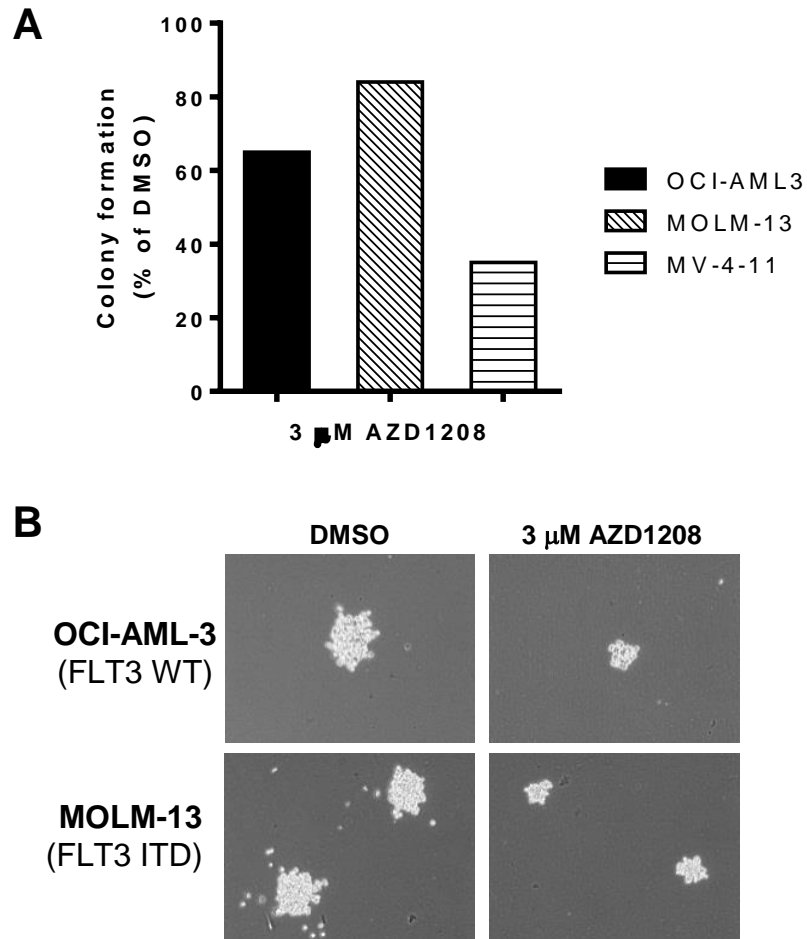

**Supplemental Figure S1.** Effect of AZD1208 on clonogenicity on OCI-AML-3, MOLM-13 and MV-4-11 AML cell lines. AML Cells were cultured in methylcellulose with either DMSO or 3 $\mu$ M AZD1208 for 5-6 days, then the number of colonies were visualized by microscope and counted.

(A) Percentage of colonies formed relative to DMSO in cells cultured with 3 $\mu$ M AZD1208 in methylcellulose.

(B) Representative colonies of OCI-AML-3 and MOLM-13 cells cultured with AZD1208 in methylcellulose, imaged at 400x magnification.

## Supplemental Figure S2

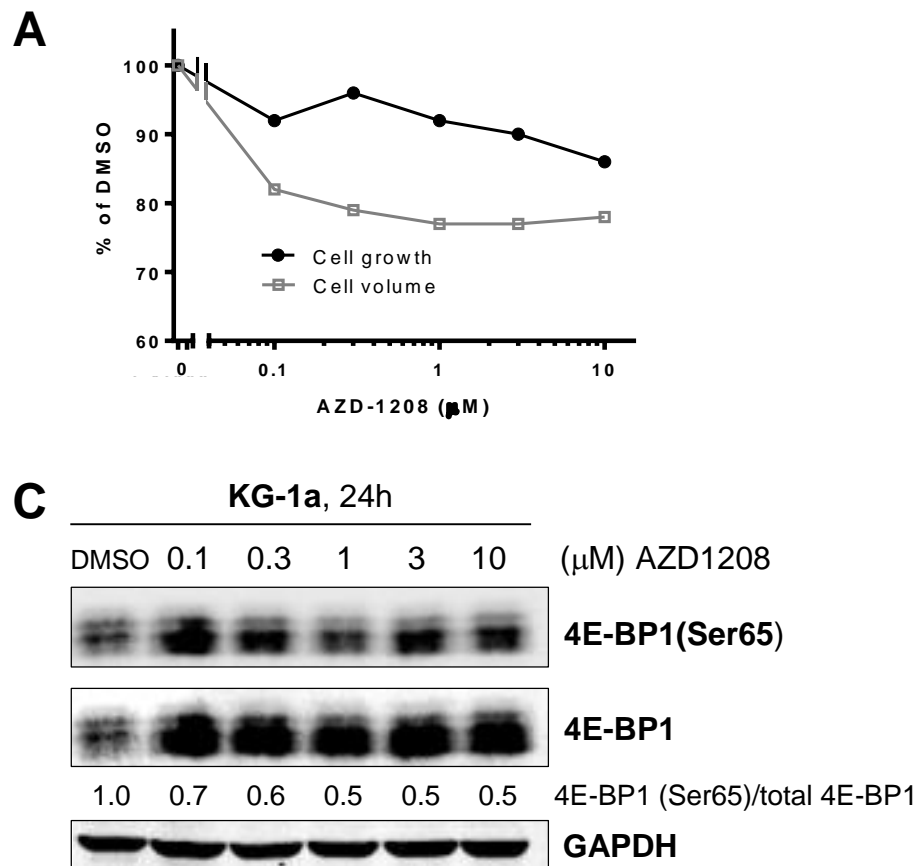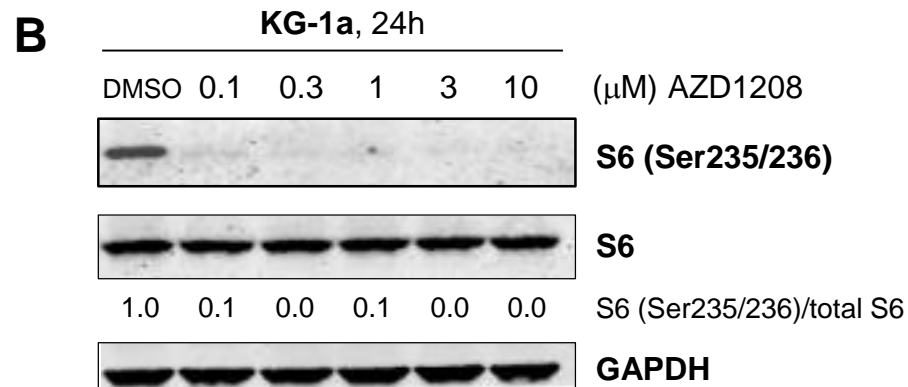

**Supplemental Figure S2.** Dose-dependent impact of AZD1208 on KG-1a cells. KG-1a cells were cultured with DMSO or 0.1, 0.3, 1, 3 or 10 µM AZD1208 for 24 h and then analyzed.

(A) Cell density and mean cell volume was measured in KG-1a cells with AZD1208 and compared with DMSO alone.

(B) Immunoblot analysis of phospho-S6(Ser235/236) and total S6 protein levels from AZD1208-treated KG-1a cells.

(C) Immunoblot analysis of phospho-4E-BP1 (Ser65) and total 4E-BP1 protein levels from AZD1208-treated KG-1a cells.

## Supplemental Figure S3

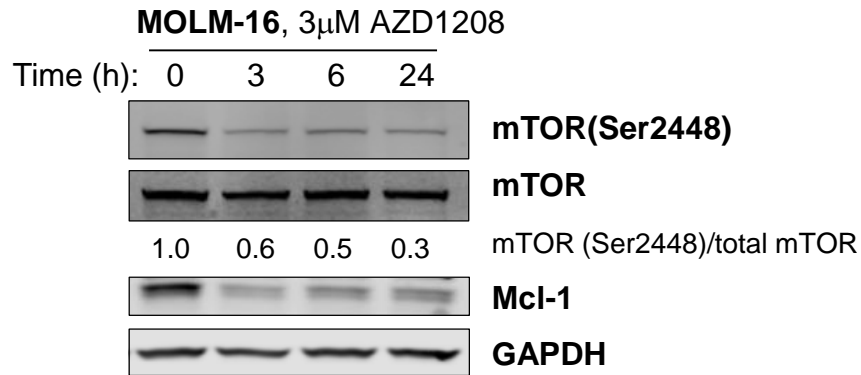

**Supplemental Figure S3.** Impact of AZD1208 on MOLM-16. MOLM-16 cells were cultured with DMSO or 3  $\mu$ M AZD1208 for 3, 6 or 24 h then cellular proteins were extracted and analyzed by immunoblot. GAPDH was used as a loading control.

## Supplemental Figure S4

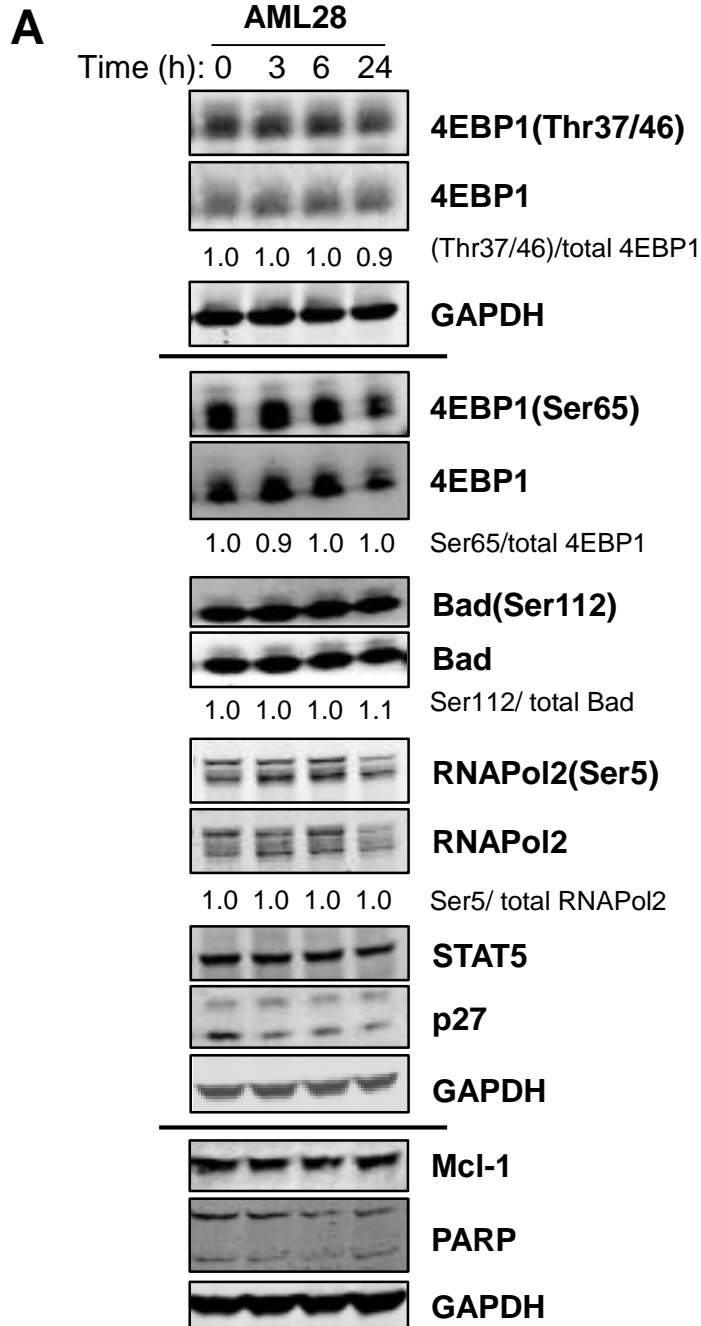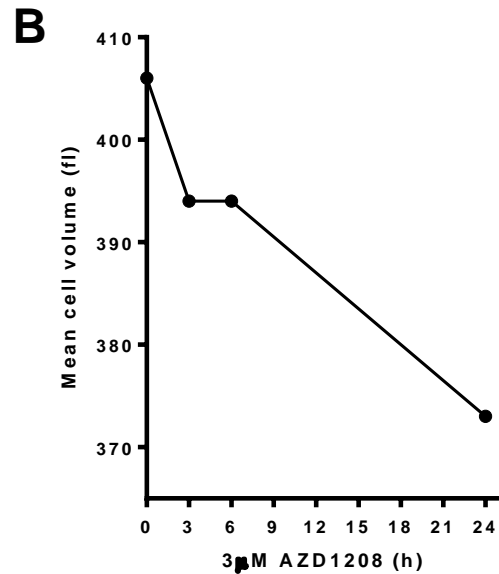

**Supplemental Figure S4.** Impact of AZD1208 on primary AML cells. AML cells were cultured with DMSO or 3 $\mu$ M AZD1208 for 3, 6 or 24 h then analyzed.

(A) Immunoblot analysis of cellular protein extracts from AZD1208-treated AML primary blasts. The figure comprises of images from three separate immunoblots, each with GAPDH as a loading control. Horizontal lines denote the separate immunoblots with the corresponding loading controls.

(B) Mean cell volume was measured in AML primary cells treated with AZD1208 for 3, 6 and 24 h and compared with DMSO alone. Cell volume is expressed in femtoliters (fl).
